# Supplementary material
Source: HighWire-hosted journal article supplement (https://bibliotheek.ehb.be:2640/highwire/filestream/160701/field_highwire_adjunct_files/1/Figure_S2.pdf)

Figure S2

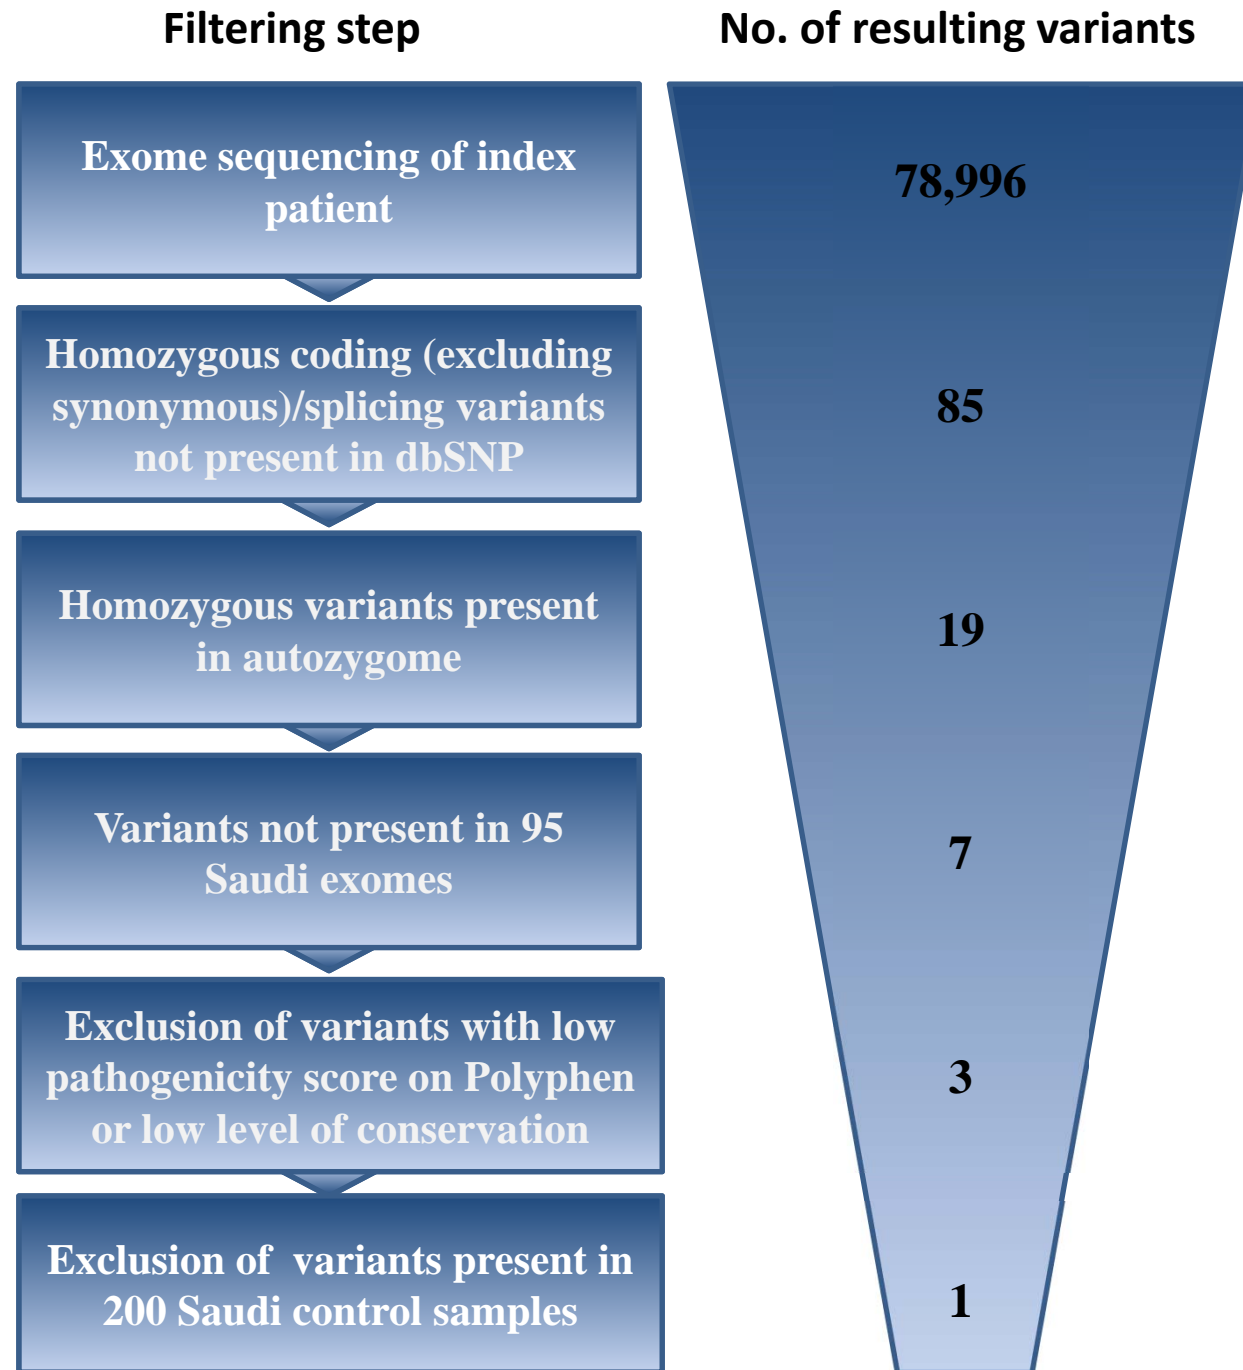

Supplement: Figure_S2.pdf [file Figure_S2.pdf]
